# Supplementary material
Source: Springer Nature journal article supplement (https://www.springermedizin.de/resource/supplementary/12888_2013_1399_MOESM7_ESM.pdf/9480130)

## WFS1

| STUDY                 | 95%_CI             | FC          |
|-----------------------|--------------------|-------------|
| Harvard.CCortex       | [-1.03,1.11]       | 1.04        |
| Harvard.Frontal       | [-1.06,1.12]       | 1.03        |
| Harvard.Hippocampus   | [-1.06,1.09]       | 1.01        |
| AltarA.FrontalBA46    | [1.09,1.24]        | 1.16        |
| Bahn.FrontalBA46      | [1.04,1.22]        | 1.13        |
| Chen.FrontalBA46      | [1.03,1.16]        | 1.1         |
| Dobrin.FrontalBA46    | [1.03,1.19]        | 1.11        |
| Kato.FrontalBA46      | [1.03,1.18]        | 1.1         |
| Kemether.Thalamus     | [-1.17,1.05]       | -1.05       |
| Laeng.Hippocampus     | [1,1.14]           | 1.07        |
| <b>Any_Brain</b>      | <b>[1.04,1.11]</b> | <b>1.07</b> |
| <b>Frontal_Cortex</b> | <b>[1.05,1.14]</b> | <b>1.1</b>  |
| <b>Hippocampus</b>    | <b>[1,1.11]</b>    | <b>1.06</b> |

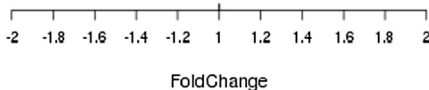

## FKBP5

| STUDY                 | 95%_CI              | FC          |
|-----------------------|---------------------|-------------|
| Harvard.CCortex       | [-1.11,1.13]        | 1.01        |
| Harvard.Hippocampus   | [-1.21,1.27]        | 1.02        |
| Bahn.FrontalBA46      | [-1.07,1.11]        | 1.02        |
| Chen.FrontalBA46      | [-1.01,1.48]        | 1.21        |
| Dobrin.FrontalBA46    | [1.2,1.83]          | 1.48        |
| Kato.FrontalBA46      | [1.02,1.19]         | 1.1         |
| Kemether.Thalamus     | [-1.04,1.94]        | 1.36        |
| Laeng.Hippocampus     | [-1.06,1.18]        | 1.05        |
| <b>Any_Brain</b>      | <b>[1.07,1.22]</b>  | <b>1.14</b> |
| <b>Frontal_Cortex</b> | <b>[1.08,1.26]</b>  | <b>1.17</b> |
| <b>Hippocampus</b>    | <b>[-1.05,1.15]</b> | <b>1.05</b> |

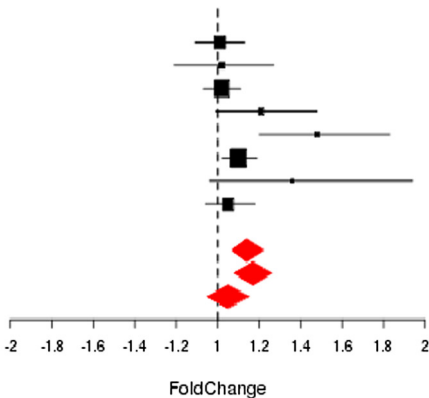

Supplement: MOESM7 [file 9480130]
